# Supplementary material
Source: Royal Society of Chemistry journal article supplement (doi:10.1039/d6se00152a)
Supplement: d6se00152a1.pdf [file d6se00152a1.pdf]

Supplementary information

**Improved reverse water-gas shift chemical looping performance of Co–In-based oxygen carriers supported on ceria**

Takuma Higo\*, Shuhei Ishizaki, Kenji Ichizuka, Yasushi Sekine\*

**This file includes:**

Figures. S1 to S17

Tables S1 to S10

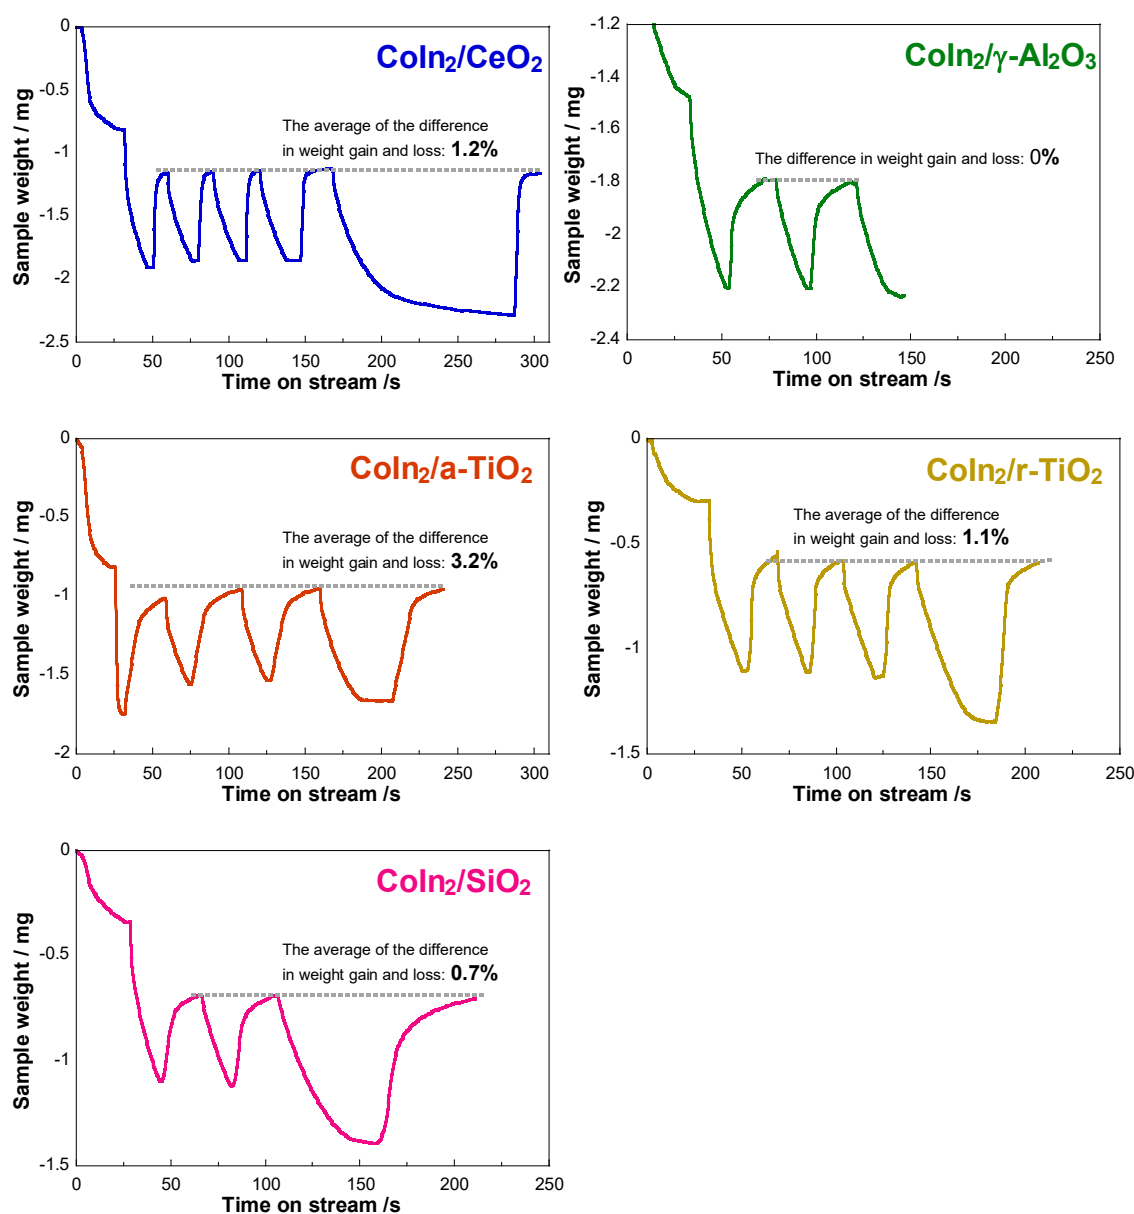

Figure S1. The TGA curves of OCs during RWGS-CL cycle.

In the TGA profiles, weight loss corresponds to oxygen release during the reduction step, while weight gain corresponds to oxygen uptake during the oxidation step. The first cycle shows a larger weight change due to the additional reduction of oxidized Co species. Therefore, the subsequent cycles (from the second cycle onward), which primarily reflect the redox behavior of In species, were used for evaluation.

The difference between weight loss and weight gain in these cycles was found to be within 0–3.2%, corresponding to 0–0.19 mmol g<sup>-1</sup> in terms of oxygen amount. These results indicate that the lattice oxygen released from the oxygen carriers, including both In species and the support, is almost fully regenerated during the redox cycles.

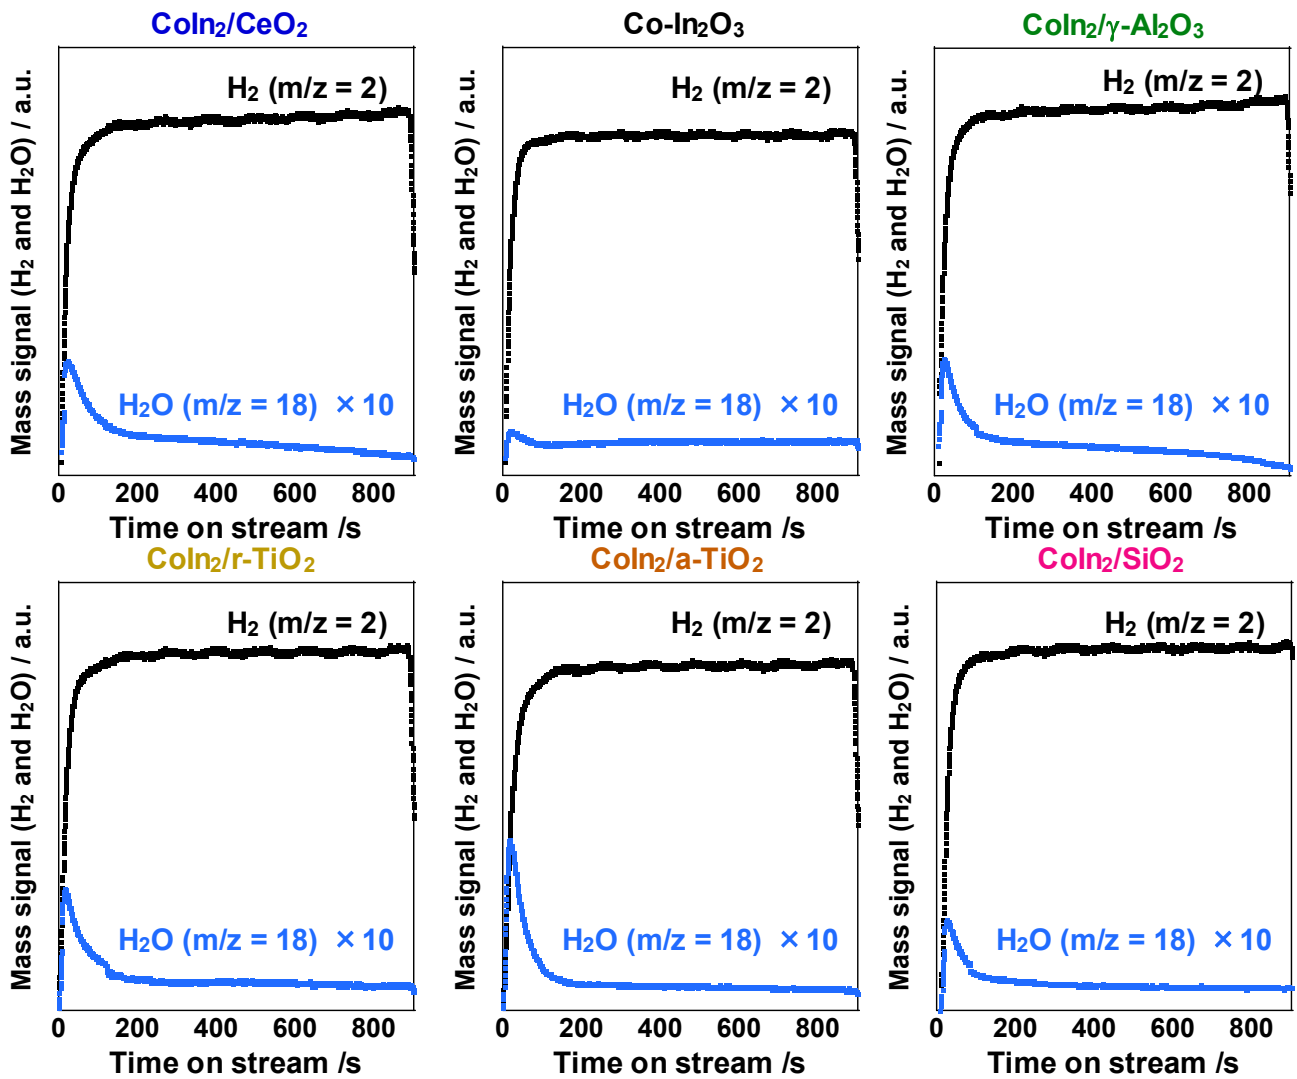

Figure S2. Mass signal of H<sub>2</sub> (m/z = 2) and H<sub>2</sub>O (m/z = 18) on the prepared OCs (20wt% CoIn<sub>2</sub>/CeO<sub>2</sub>, Co-In<sub>2</sub>O<sub>3</sub>, 20wt% CoIn<sub>2</sub>/γ-Al<sub>2</sub>O<sub>3</sub>, 20wt% CoIn<sub>2</sub>/r-TiO<sub>2</sub>, 20wt% CoIn<sub>2</sub>/α-TiO<sub>2</sub> and 20wt% CoIn<sub>2</sub>/SiO<sub>2</sub>) during the reduction step.

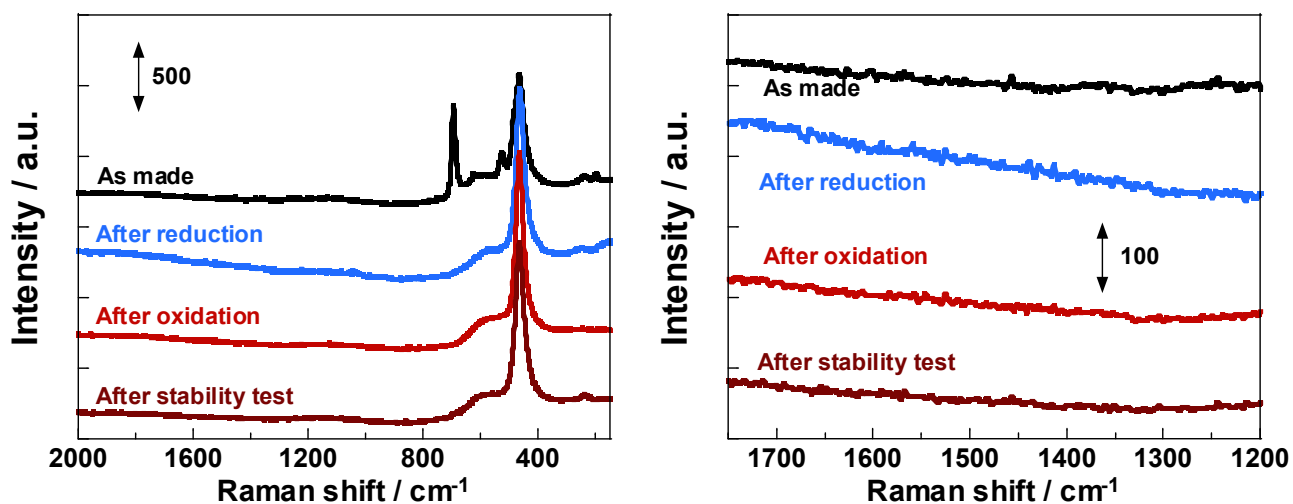

Figure S3. Raman spectra of 20wt%  $\text{CoIn}_2/\text{CeO}_2$  (As-prepared, after reduction step, after oxidation step and after the stability test).

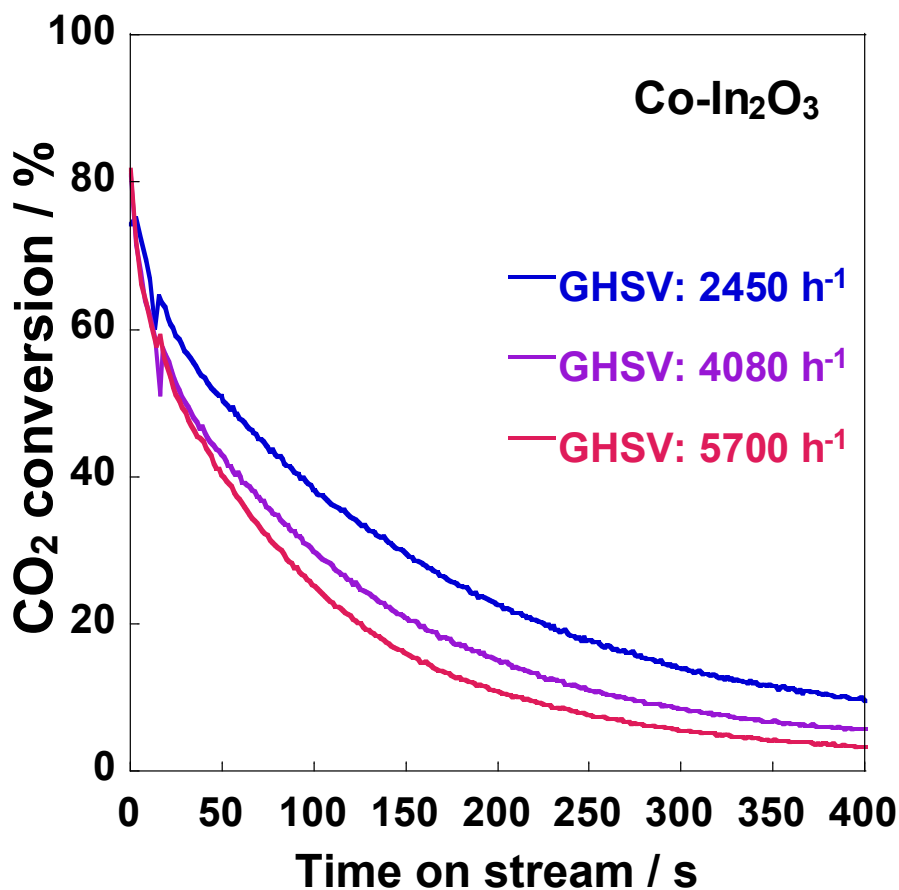

Figure S4  $\text{CO}_2$  conversion on 20wt%  $\text{CoIn}_2/\text{CeO}_2$  during the oxidation step using 100vol%  $\text{CO}_2$ .

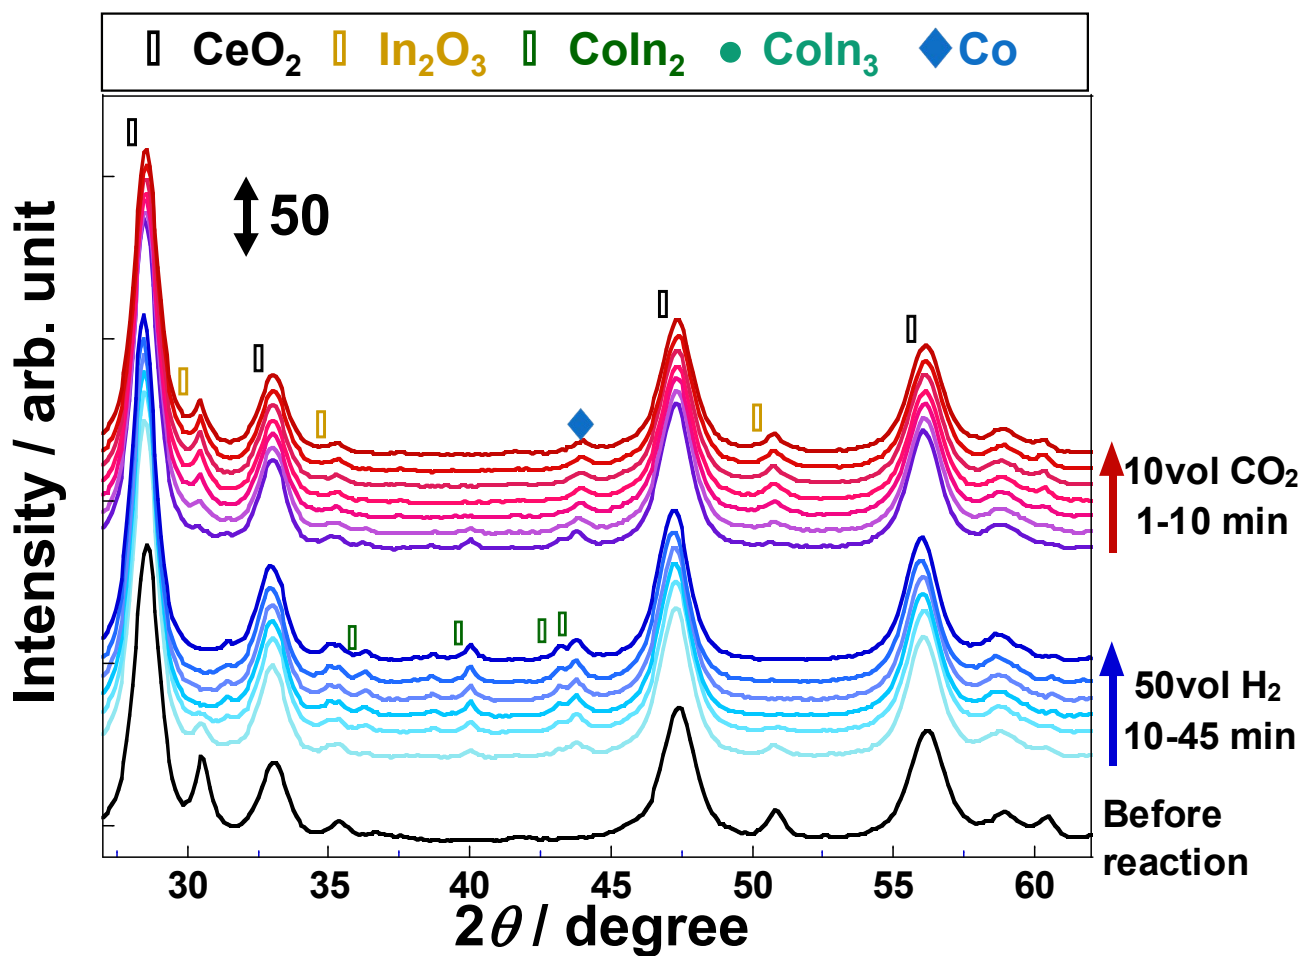

Figure S5 *In-situ* XRD results of 20wt%  $\text{CoIn}_2/\text{CeO}_2$  under 50vol%  $\text{H}_2$  (reduction step) and 10vol%  $\text{CO}_2$  (oxidation step) at 773 K.

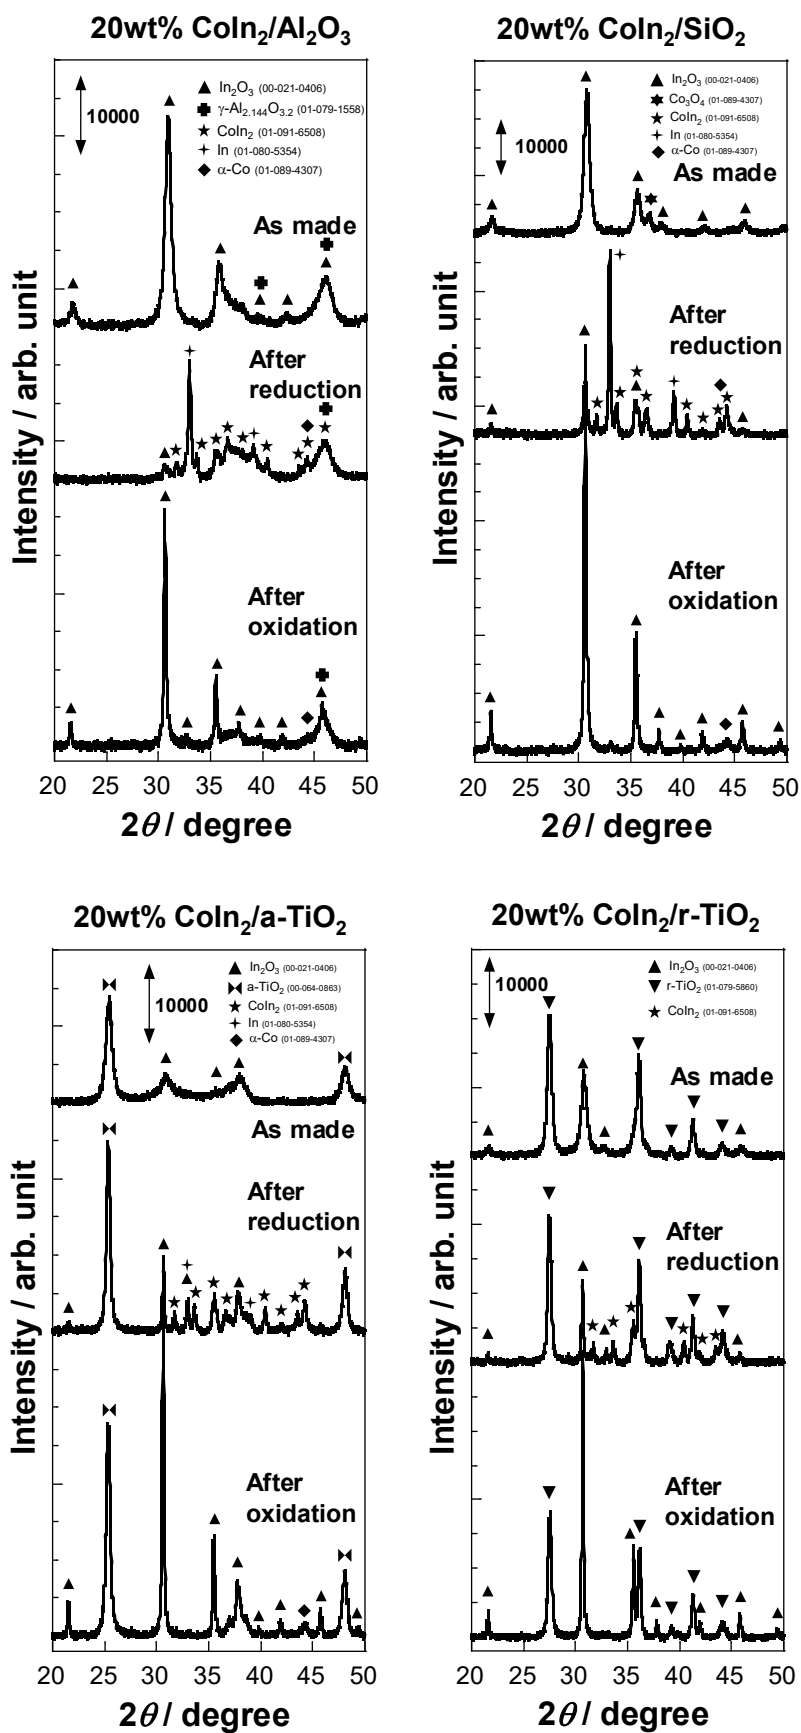

Figure S6 XRD patterns of CoIn<sub>2</sub> supported OCs before and after RWGS-CL cycle.

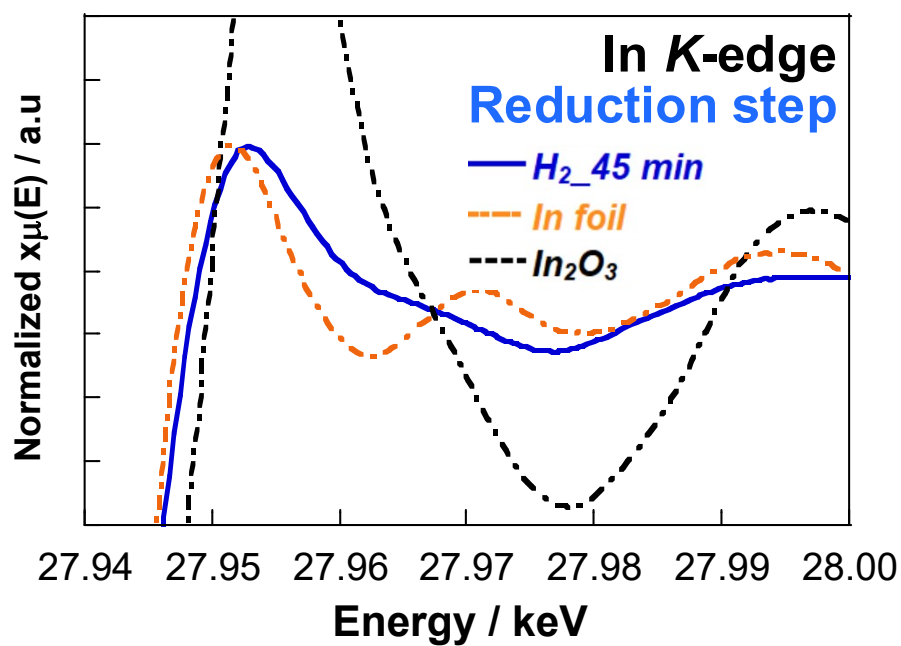

Figure S7 Enlarged view near the isosbestic point in the *in-situ* XANES spectra during reduction.

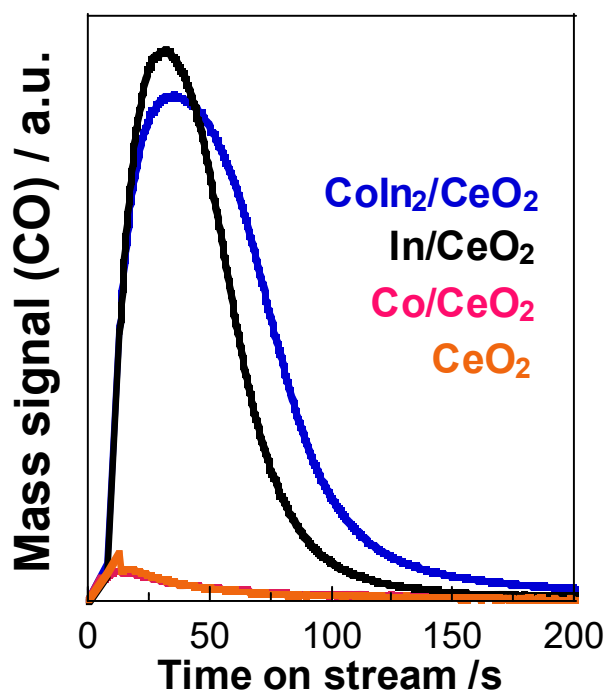

Figure S8 Mass signal of CO ( $m/z = 28$ ) on the prepared OCs (20wt%  $\text{CoIn}_2/\text{CeO}_2$ , 15.9wt%  $\text{In}/\text{CeO}_2$ , 4.1wt%  $\text{Co}/\text{CeO}_2$  and  $\text{CeO}_2$ ) at the oxidation step.

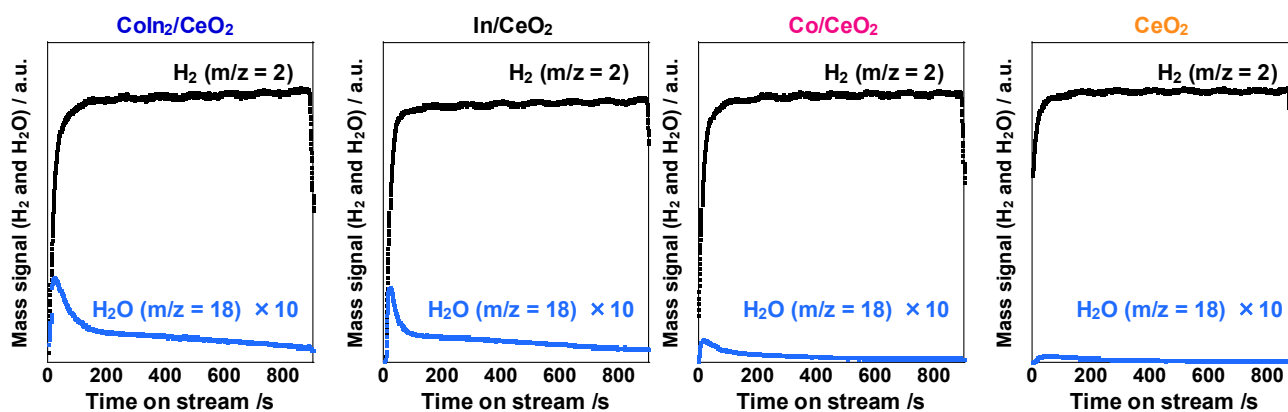

Figure S9. Mass signal of  $\text{H}_2$  ( $m/z = 2$ ) and  $\text{H}_2\text{O}$  ( $m/z = 18$ ) on the prepared OCs (20wt%  $\text{CoIn}_2/\text{CeO}_2$ , 15.9wt%  $\text{In}/\text{CeO}_2$ , 4.1wt%  $\text{Co}/\text{CeO}_2$  and  $\text{CeO}_2$ ) during the reduction step.

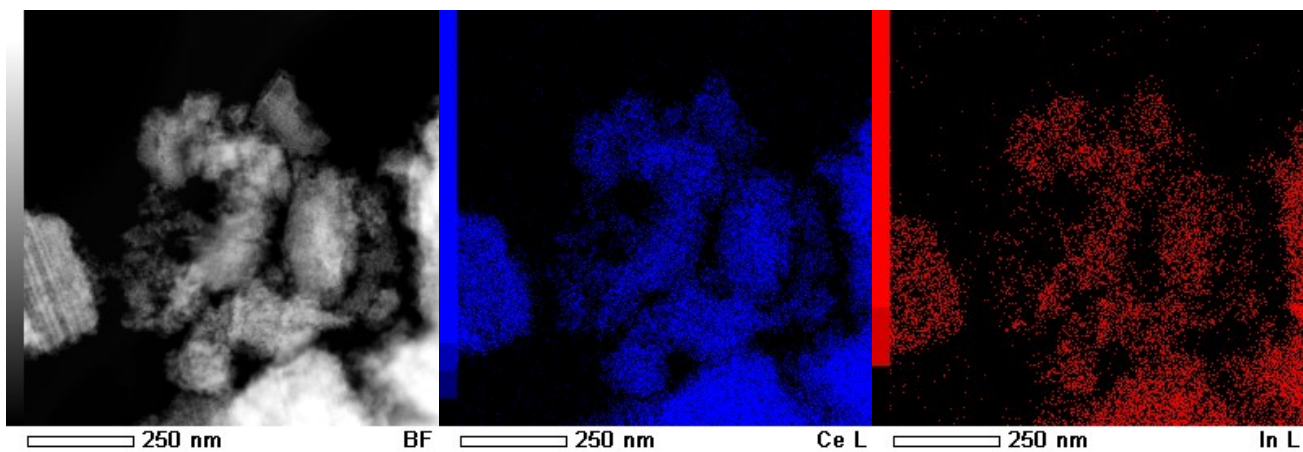

Figure S10. EDX mapping images of 15.9wt% In/CeO<sub>2</sub> after the reduction step.

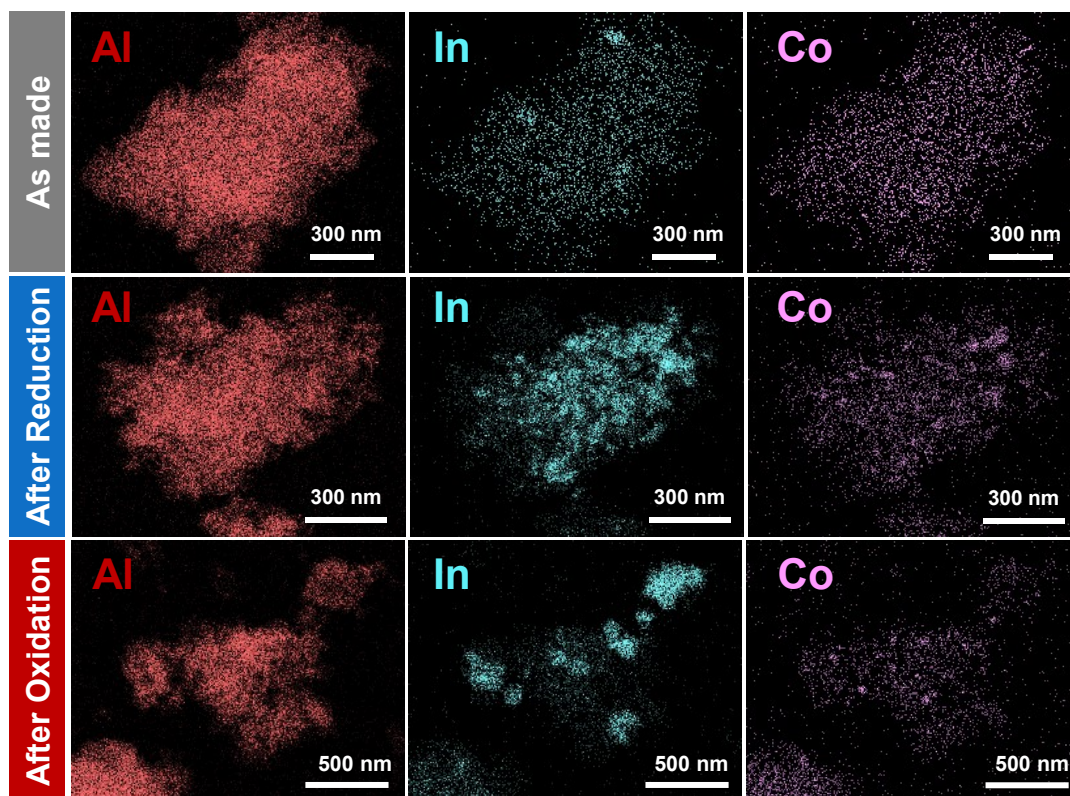

Figure S11. EDX mapping images for CoIn<sub>2</sub>/Al<sub>2</sub>O<sub>3</sub> before and after RWGS-CL cycle test.

### After 1<sup>st</sup> reduction ( $\text{CoIn}_2/\text{CeO}_2$ )

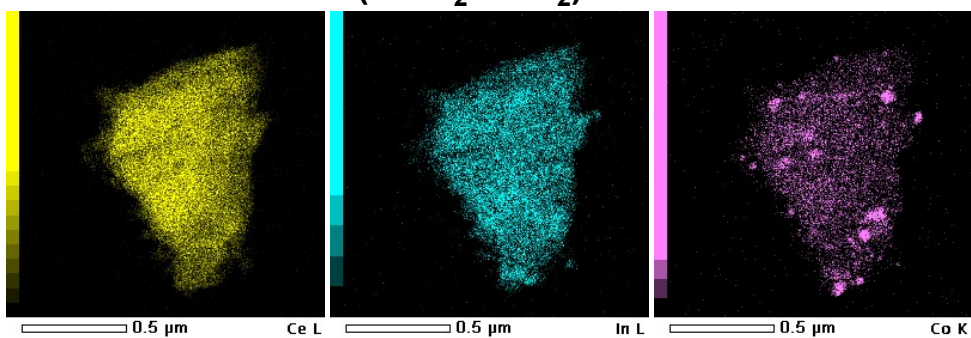

### After 1<sup>st</sup> oxidation ( $\text{CoIn}_2/\text{CeO}_2$ )

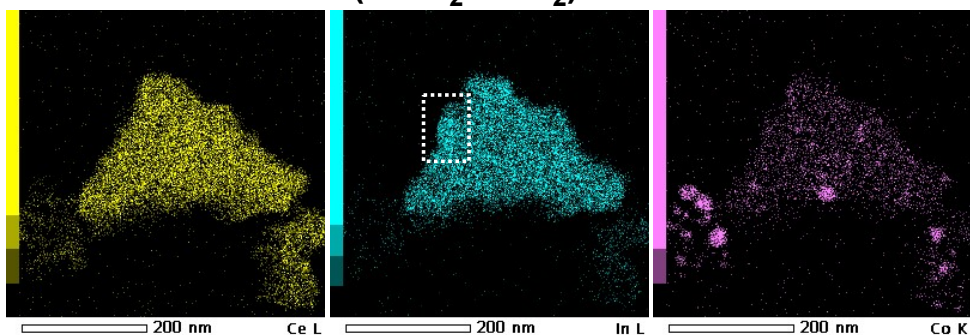

Figure S12. EDX mapping images of  $\text{CoIn}_2/\text{CeO}_2$  (after 1st RWGS-CL cycle).

### After 15<sup>th</sup> oxidation ( $\text{CoIn}_2/\text{CeO}_2$ after stability test)

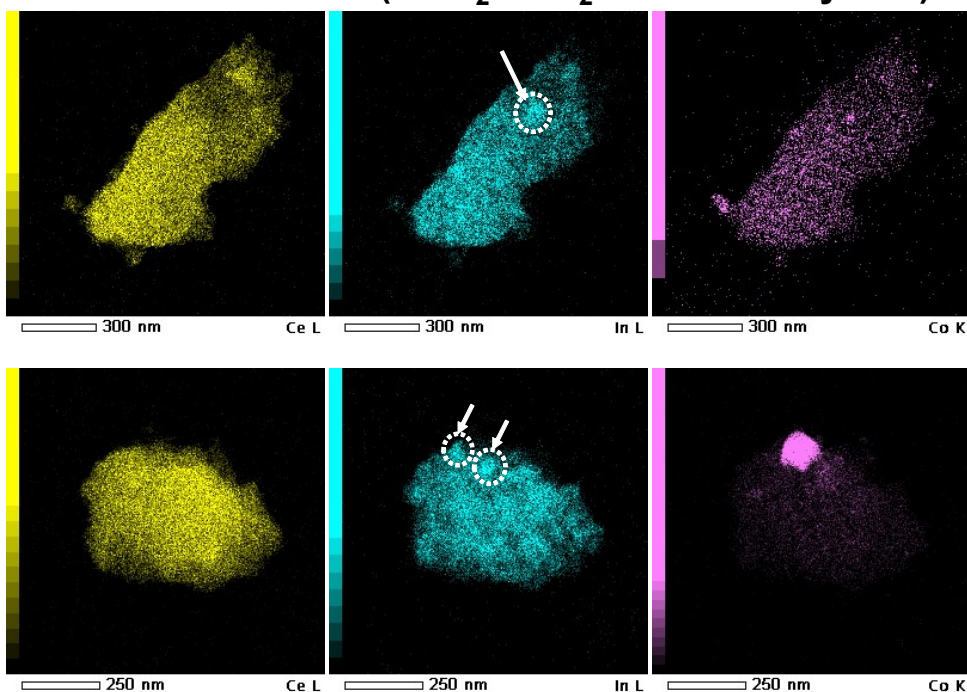

Figure S13. EDX mapping images of  $\text{CoIn}_2/\text{CeO}_2$  after 15th oxidation step (stability test).

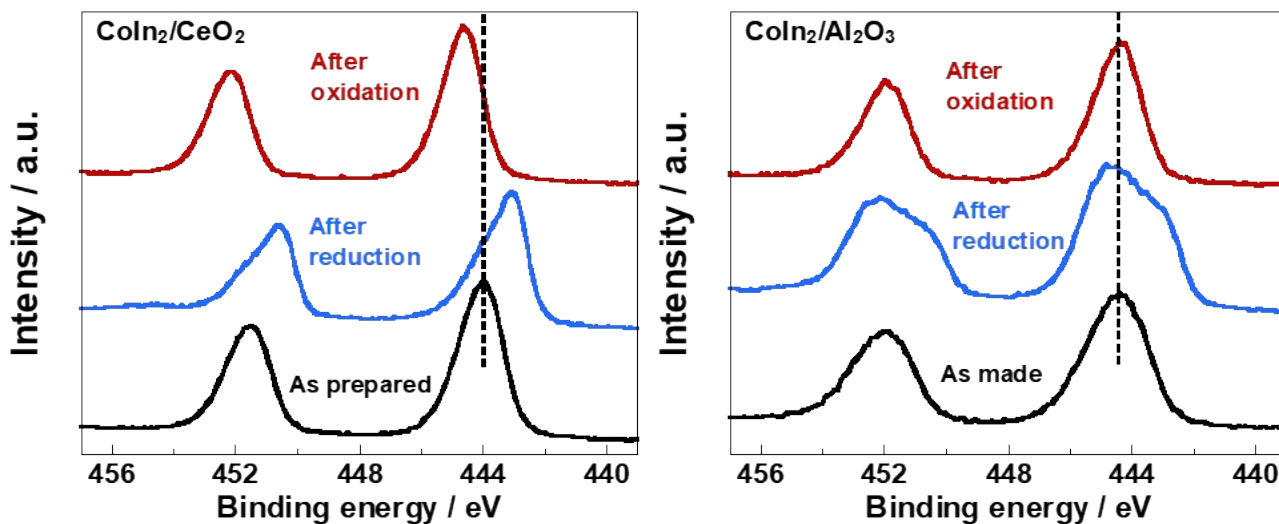

Figure S14. XPS spectra of the In<sub>3d</sub> region for CoIn<sub>2</sub>/CeO<sub>2</sub> and CoIn<sub>2</sub>/Al<sub>2</sub>O<sub>3</sub>

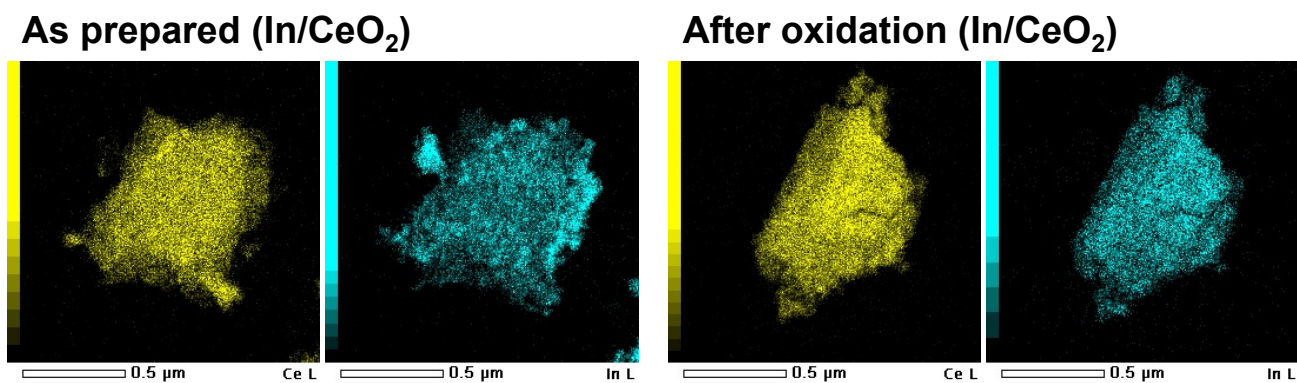

Figure S15. EDX mapping images of In/CeO<sub>2</sub> (As-prepared and after oxidation step).

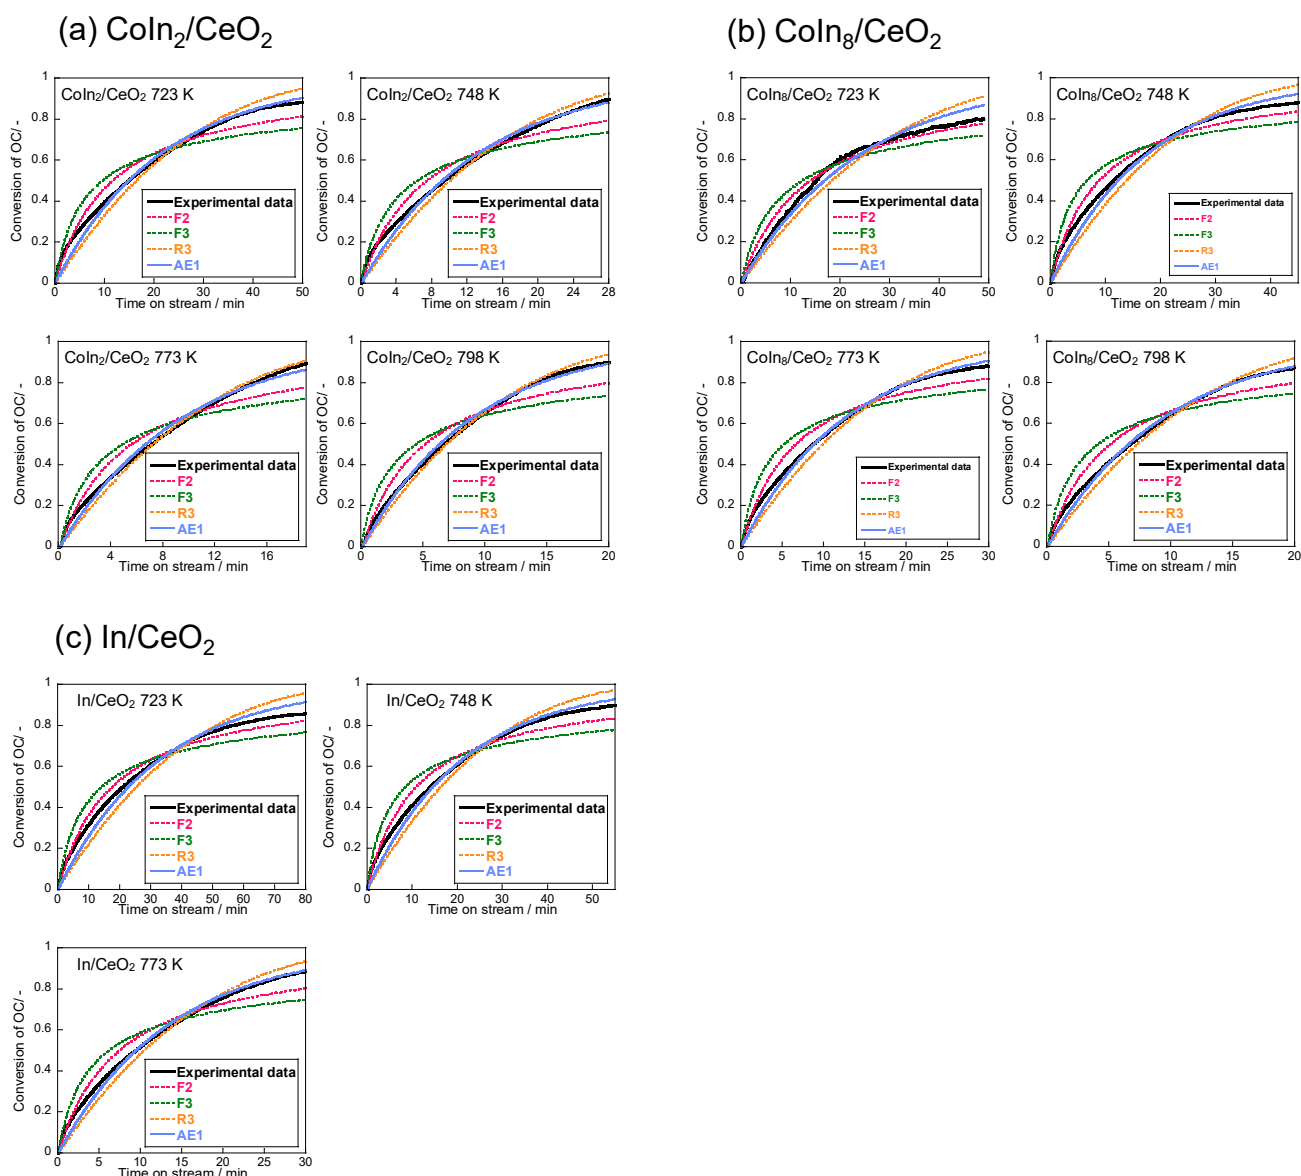

Figure S16 Comparison of experimental data for reduction of (a)  $\text{CoIn}_2/\text{CeO}_2$ , (b)  $\text{CoIn}_8/\text{CeO}_2$  and (c)  $\text{In}/\text{CeO}_2$  by  $\text{H}_2$  with Avrami Erofe'ev model (AE1), phase-boundary controlled reaction model (R3), third order model (F3) and second order model (F2).

In this study, experimental data for reduction step were obtained by thermogravimetric analysis (TGA). The reduction conversion was defined by the following equation:

$$x(\text{reduction}) = \frac{m_i - m_t}{m_i - m_f}$$

where  $m_i$  is the initial mass,  $m_t$  is the mass at time  $t$ , and  $m_f$  is the final mass of the oxide after complete reduction. From the values of solid-state conversion  $x$  and reaction time  $t$ , plots of  $\ln[-\ln(1-x)]$  vs.  $\ln(t)$  were constructed, and the slope of each plot was used to identify the most appropriate kinetic model. In the present analysis, the slopes obtained for all oxygen carriers were in the range of approximately 0.8–1.2. Accordingly, four kinetic models were considered as candidates: the

Avrami–Erofe’ev model (AE1), the phase-boundary-controlled reaction model (R3), the third-order reaction model (F3), and the second-order reaction model (F2). By comparing the experimental data with the calculated conversion profiles and evaluating the root mean square deviation (RMSD), the AE1 model was found to provide the best fit to the experimental results.

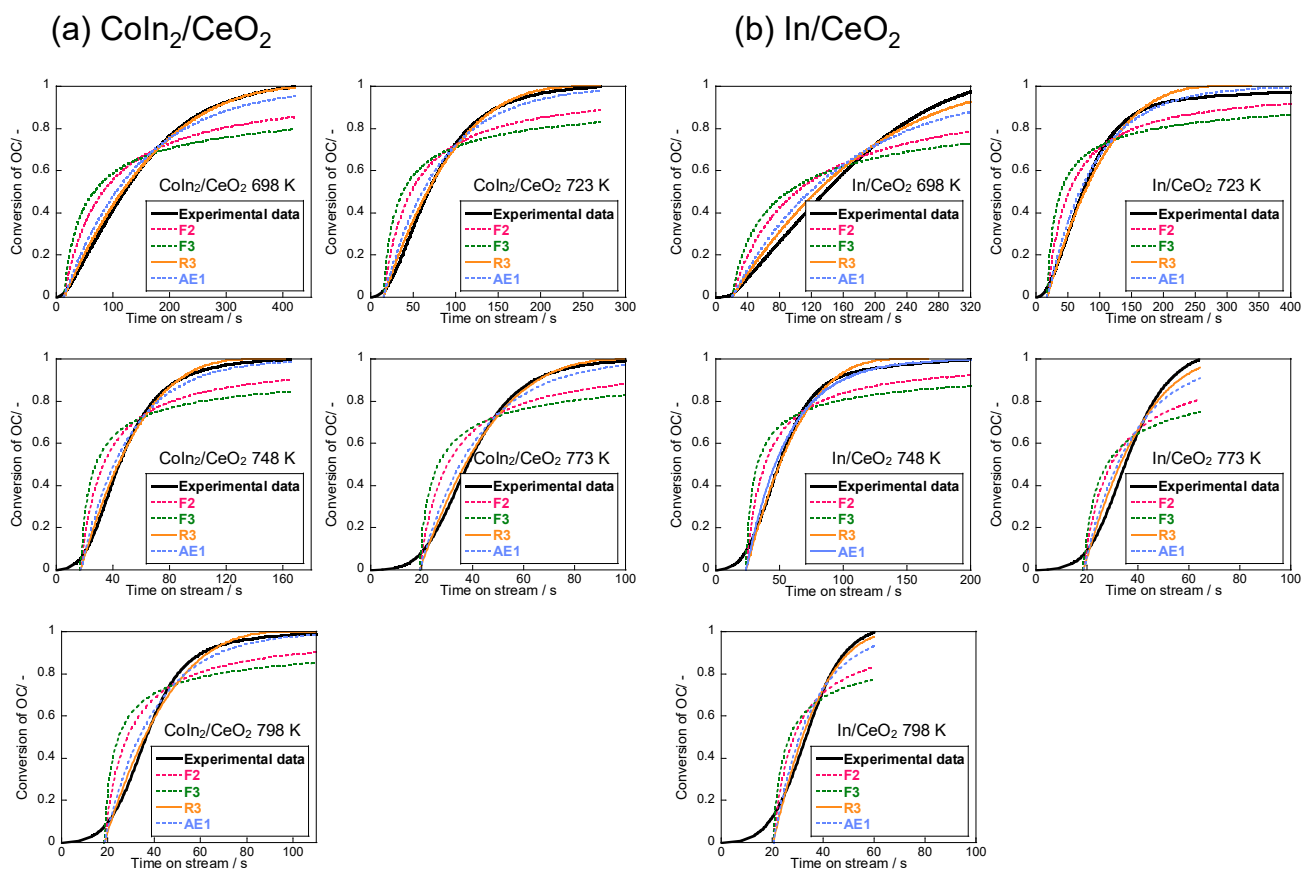

Figure S17 Comparison of experimental data for oxidation of (a)  $\text{CoIn}_2/\text{CeO}_2$ , (b)  $\text{In}/\text{CeO}_2$  by  $\text{CO}_2$  with Avrami Erofe’ev model (AE1), phase-boundary controlled reaction model (R3), third order model (F3) and second order model (F2).

Table S1. Performance for CO production on the prepared OCs at the oxidation step.

| Oxygen carrier                                                | CO production <sup>b</sup><br>/mmol | CO yield <sup>b</sup><br>/ mmol<br>g <sub>oc</sub> <sup>-1</sup> | CO yield per gram of<br>CoIn <sub>2</sub> <sup>b</sup><br>/ mmol g <sub>CoIn2</sub> <sup>-1</sup> | Reduction<br>degree<br>/ % | Oxidation<br>completion time <sup>b</sup><br>/s | STY of CO <sup>b</sup><br>/ mmol g <sub>oc</sub> <sup>-1</sup> h <sup>-1</sup> | STY of CO per<br>gram of CoIn <sub>2</sub> <sup>b</sup><br>/ mmol g <sub>CoIn2</sub> <sup>-1</sup> | Overall CO <sub>2</sub><br>conversion <sup>b</sup><br>/ % |
|---------------------------------------------------------------|-------------------------------------|------------------------------------------------------------------|---------------------------------------------------------------------------------------------------|----------------------------|-------------------------------------------------|--------------------------------------------------------------------------------|----------------------------------------------------------------------------------------------------|-----------------------------------------------------------|
| 20wt% CoIn <sub>2</sub> /<br>CeO <sub>2</sub>                 | 0.313                               | 2.08                                                             | 10.4                                                                                              | 83.8                       | 240                                             | 31.2                                                                           | 156                                                                                                | 17.5                                                      |
| Co-In <sub>2</sub> O <sub>3</sub> <sup>a</sup>                | 0.318                               | 2.11                                                             | 10.6                                                                                              | 23.4                       | 678                                             | 11.2                                                                           | 56.0                                                                                               | 6.3                                                       |
| 20wt% CoIn <sub>2</sub> /<br>γ-Al <sub>2</sub> O <sub>3</sub> | 0.187                               | 1.43                                                             | 7.15                                                                                              | 68.8                       | 413                                             | 12.5                                                                           | 62.5                                                                                               | 6.1                                                       |
| 20wt% CoIn <sub>2</sub> /<br>r-TiO <sub>2</sub>               | 0.273                               | 1.82                                                             | 9.10                                                                                              | 79.2                       | 599                                             | 11.0                                                                           | 55.0                                                                                               | 6.1                                                       |
| 20wt% CoIn <sub>2</sub> /<br>a-TiO <sub>2</sub>               | 0.287                               | 1.91                                                             | 9.55                                                                                              | 83.5                       | 1008                                            | 6.8                                                                            | 34.0                                                                                               | 3.8                                                       |
| 20wt% CoIn <sub>2</sub> /<br>SiO <sub>2</sub>                 | 0.210                               | 1.40                                                             | 7.00                                                                                              | 67.3                       | 1011                                            | 5.1                                                                            | 25.5                                                                                               | 2.8                                                       |

<sup>a</sup> Co/In = 0.5, 16.5wt% Co loaded on In<sub>2</sub>O<sub>3</sub>, <sup>b</sup> Average values of 3 cycle

Table S2. H<sub>2</sub>O yields on the prepared OCs during the reduction step.

| Oxygen carriers                                     | H <sub>2</sub> O yield / mmol g <sup>-1</sup> |                       |                       |                                                      | CO yield <sup>a</sup> |
|-----------------------------------------------------|-----------------------------------------------|-----------------------|-----------------------|------------------------------------------------------|-----------------------|
|                                                     | 1 <sup>st</sup> cycle                         | 2 <sup>nd</sup> cycle | 3 <sup>rd</sup> cycle | Average of 2 <sup>nd</sup> and 3 <sup>rd</sup> cycle |                       |
| CoIn <sub>2</sub> /CeO <sub>2</sub>                 | 3.04                                          | 2.18                  | 2.16                  | 2.17                                                 | 2.08                  |
| Co-In <sub>2</sub> O <sub>3</sub>                   | 6.07                                          | 1.93                  | 2.17                  | 2.05                                                 | 2.11                  |
| CoIn <sub>2</sub> /γ-Al <sub>2</sub> O <sub>3</sub> | 2.55                                          | 1.77                  | 1.62                  | 1.69                                                 | 1.43                  |
| CoIn <sub>2</sub> /r-TiO <sub>2</sub>               | 2.63                                          | 1.94                  | 1.90                  | 1.92                                                 | 1.82                  |
| CoIn <sub>2</sub> /a-TiO <sub>2</sub>               | 2.89                                          | 1.81                  | 1.94                  | 1.87                                                 | 1.91                  |
| CoIn <sub>2</sub> /SiO <sub>2</sub>                 | 2.68                                          | 1.57                  | 1.37                  | 1.47                                                 | 1.40                  |

<sup>a</sup> CO yield reported in Table S1

Table S3. The summary of the performance on 20wt% CoIn<sub>2</sub>/CeO<sub>2</sub> during the stability test.

| Cycle number | CO yield<br>/mmol g <sup>-1</sup> | Reduction<br>degree / % | Space-time Yield<br>/mmol g <sup>-1</sup> h <sup>-1</sup> | Overall<br>CO <sub>2</sub> conversion<br>/ % |
|--------------|-----------------------------------|-------------------------|-----------------------------------------------------------|----------------------------------------------|
| 1            | 2.05                              | 82.5                    | 35.0                                                      | 19.6                                         |
| 2            | 1.97                              | 79.2                    | 33.6                                                      | 18.8                                         |
| 3            | 1.95                              | 78.5                    | 32.2                                                      | 18.0                                         |
| 4            | 1.92                              | 77.4                    | 32.0                                                      | 17.9                                         |
| 5            | 1.91                              | 76.9                    | 31.6                                                      | 17.7                                         |
| 6            | 1.90                              | 76.5                    | 31.1                                                      | 17.4                                         |
| 7            | 1.89                              | 76.3                    | 30.7                                                      | 17.2                                         |
| 8            | 1.90                              | 76.3                    | 30.2                                                      | 16.9                                         |
| 9            | 1.89                              | 76.0                    | 30.7                                                      | 17.2                                         |
| 10           | 1.88                              | 75.9                    | 30.2                                                      | 16.9                                         |
| 11           | 1.89                              | 76.0                    | 30.1                                                      | 16.8                                         |
| 12           | 1.87                              | 75.3                    | 30.5                                                      | 17.1                                         |
| 13           | 1.87                              | 75.4                    | 30.4                                                      | 17.0                                         |
| 14           | 1.87                              | 75.3                    | 30.4                                                      | 17.0                                         |
| 15           | 1.87                              | 75.3                    | 30.7                                                      | 17.2                                         |

Table S4. Summary of the performance on Co-In<sub>2</sub>O<sub>3</sub> and 20wt% CoIn<sub>2</sub>/CeO<sub>2</sub> at the oxidation step using 100vol% CO<sub>2</sub>.

| Oxygen carrier                            | GHSV / h <sup>-1</sup> | CO yield<br>/ mmol g <sup>-1</sup> | Max. CO <sub>2</sub> conversion<br>/ % | Total CO <sub>2</sub><br>conversion / % |
|-------------------------------------------|------------------------|------------------------------------|----------------------------------------|-----------------------------------------|
| Co-In <sub>2</sub> O <sub>3</sub>         | 5700                   | 2.31                               | 81.8                                   | 3.7                                     |
|                                           | 4080                   | 2.77                               | 81.1                                   | 6.0                                     |
|                                           | 2450                   | 2.71                               | 75.2                                   | 9.5                                     |
| -----                                     |                        |                                    |                                        |                                         |
| 20wt% CoIn <sub>2</sub> /CeO <sub>2</sub> | 5700                   | 1.87                               | 100                                    | 12.4                                    |
|                                           | 4080                   | 1.83                               | 100                                    | 15.4                                    |
|                                           | 2450                   | 1.84                               | 100                                    | 20.6                                    |

Table S5. Comparison of 20wt% CoIn<sub>2</sub>/CeO<sub>2</sub> to other reported supported-type oxygen carriers for RWGS-CL.

| Material                                                                                                      | Temperature<br>/ K | CO <sub>2</sub> concentration<br>/ % | CO yield<br>/ mmol g <sup>-1</sup> | STY of CO<br>/ mmol g <sup>-1</sup> h <sup>-1</sup> |
|---------------------------------------------------------------------------------------------------------------|--------------------|--------------------------------------|------------------------------------|-----------------------------------------------------|
| 20wt% CoIn <sub>2</sub> /CeO <sub>2</sub>                                                                     | 723                | 10                                   | 1.20                               | 12.9                                                |
|                                                                                                               | 773                | 10                                   | 2.08                               | 31.2                                                |
|                                                                                                               | 823                | 10                                   | 2.17                               | 37.6                                                |
| <hr/>                                                                                                         |                    |                                      |                                    |                                                     |
| 40wt% Fe <sub>2</sub> O <sub>3</sub> /ZrO <sub>2</sub>                                                        | 773                | 5                                    | -                                  | ca. 20.7                                            |
| 25wt% La <sub>0.8</sub> Sr <sub>0.2</sub> FeO <sub>3</sub> /SBA-15                                            | 873                | 12.5                                 | 2.80                               | 16.8                                                |
| 25wt% La <sub>0.75</sub> Sr <sub>0.25</sub> FeO <sub>3</sub> /SiO <sub>2</sub>                                | 873                | 10                                   | 0.65                               | 12 <sup>a</sup>                                     |
| ZrO <sub>2</sub> -modified Fe <sub>2</sub> O <sub>3</sub><br>(Fe <sub>2</sub> O <sub>3</sub> content = 10wt%) | 923                | 30 or 100                            | -                                  | 31                                                  |
| 60wt% Fe <sub>2</sub> O <sub>3</sub> /La <sub>0.1</sub> Sm <sub>0.1</sub> Ce <sub>0.8</sub> O <sub>2-δ</sub>  | 923                | 10                                   | 8.93                               | 35.7                                                |
| 50wt% La <sub>0.75</sub> Sr <sub>0.25</sub> FeO <sub>3</sub> /SBA-15                                          | 973                | 10                                   | ca. 2                              | ca. 6.0                                             |
| 50mol% CeO <sub>2</sub> ·Ca <sub>2</sub> Fe <sub>2</sub> O <sub>5</sub>                                       | 973                | 20                                   | -                                  | 32.7                                                |
| 70wt% Fe <sub>2</sub> O <sub>3</sub> /GDC-30                                                                  | 1023               | 10                                   | 10.8                               | 46.2                                                |
| 10-Mg-Al-Fe-O<br>(Fe <sub>2</sub> O <sub>3</sub> content = 10wt%)                                             | 1023               | 5                                    | 1.16                               | 17.6                                                |
| 10wt% Fe <sub>2</sub> O <sub>3</sub> -MgAl <sub>2</sub> O <sub>4</sub>                                        | 1023               | 40                                   | -                                  | 176.4                                               |

<sup>a</sup> peak rate of CO production

Table S6. BET specific surface area of each supported CoIn<sub>2</sub> OCs before and after RWGS-CL cycle.

| Oxygen carrier                                            | As made                          | After reduction                  | After oxidation                  |
|-----------------------------------------------------------|----------------------------------|----------------------------------|----------------------------------|
|                                                           | / m <sup>2</sup> g <sup>-1</sup> | / m <sup>2</sup> g <sup>-1</sup> | / m <sup>2</sup> g <sup>-1</sup> |
| 20wt% CoIn <sub>2</sub> /CeO <sub>2</sub>                 | 58.5                             | 20.1                             | 18.8                             |
| Co-In <sub>2</sub> O <sub>3</sub>                         | 10.1                             | 4.4                              | 3.0                              |
| 20wt% CoIn <sub>2</sub> /γ-Al <sub>2</sub> O <sub>3</sub> | 137.2                            | 102.2                            | 114.9                            |
| 20wt% CoIn <sub>2</sub> /SiO <sub>2</sub>                 | 96.0                             | 92.3                             | 88.8                             |
| 20wt% CoIn <sub>2</sub> /α-TiO <sub>2</sub>               | 64.5                             | 39.9                             | 46.7                             |
| 20wt% CoIn <sub>2</sub> /r-TiO <sub>2</sub>               | 41.8                             | 33.0                             | 30.4                             |

Table S7. H<sub>2</sub>O yields on OCs prepared with different Co/In ratios during the reduction step

| Oxygen carriers            | H <sub>2</sub> O yield / mmol g <sup>-1</sup> |                       |                       |                                                      | CO yield <sup>b</sup> / mmol g <sup>-1</sup> |
|----------------------------|-----------------------------------------------|-----------------------|-----------------------|------------------------------------------------------|----------------------------------------------|
|                            | 1 <sup>st</sup> cycle                         | 2 <sup>nd</sup> cycle | 3 <sup>rd</sup> cycle | Average of 2 <sup>nd</sup> and 3 <sup>rd</sup> cycle |                                              |
| 4.1wt% Co/CeO <sub>2</sub> | 0.933                                         | 0.331                 | 0.304                 | 0.32                                                 | 0.07                                         |
| CeO <sub>2</sub>           | 0.00                                          | 0.00                  | 0.00                  | 0.00                                                 | 0.07                                         |

<sup>b</sup> CO yield reported in Table 1

Table S8. Ratio of elements for 20wt% CoIn<sub>2</sub>/CeO<sub>2</sub> after RWGS-CL cycle tests.

| Sample                      | Ratio of elements measured by ICP / % |     |      |
|-----------------------------|---------------------------------------|-----|------|
|                             | In                                    | Co  | Ce   |
| After 1 <sup>st</sup> cycle | 22.3                                  | 4.9 | 72.8 |
| After stability test        | 22.2                                  | 4.9 | 72.9 |

Table S9. The performance for CO production at the oxidation step on the OCs with different Co loading.

| Oxygen carrier                      | Co / wt% | In / wt% | Co/In ratio | CO production /mmol | CO yield / mmol g <sup>-1</sup> | Reduction degree / % | STY of CO / mmol g <sup>-1</sup> h <sup>-1</sup> | Overall CO <sub>2</sub> conversion <sup>a</sup> / % |
|-------------------------------------|----------|----------|-------------|---------------------|---------------------------------|----------------------|--------------------------------------------------|-----------------------------------------------------|
| CoIn/CeO <sub>2</sub>               | 8.2      | 15.9     | 1           | 0.307               | 2.05                            | 90.6                 | 33.9                                             | 18.9                                                |
| CoIn <sub>2</sub> /CeO <sub>2</sub> | 4.1      | 15.9     | 0.5         | 0.313               | 2.08                            | 83.8                 | 31.2                                             | 17.5                                                |
| CoIn <sub>4</sub> /CeO <sub>2</sub> | 2.1      | 15.9     | 0.25        | 0.288               | 1.92                            | 85.5                 | 29.2                                             | 16.3                                                |
| CoIn <sub>8</sub> /CeO <sub>2</sub> | 1.0      | 15.9     | 0.125       | 0.294               | 1.96                            | 90.6                 | 28.7                                             | 16.0                                                |
| In/CeO <sub>2</sub>                 | 0        | 15.9     | 0           | 0.219               | 1.46                            | 73.1                 | 36.0                                             | 20.2                                                |

<sup>a</sup> Average values of 3 cycle

Table S10. H<sub>2</sub>O yields on OCs prepared with different Co/In ratios during the reduction step

| Oxygen carriers                     | Co/In ratio / - | H <sub>2</sub> O yield / mmol g <sup>-1</sup> |                       |                       |      | Average of 2 <sup>nd</sup> and 3 <sup>rd</sup> cycle | CO yield <sup>c</sup> / mmol g <sup>-1</sup> |
|-------------------------------------|-----------------|-----------------------------------------------|-----------------------|-----------------------|------|------------------------------------------------------|----------------------------------------------|
|                                     |                 | 1 <sup>st</sup> cycle                         | 2 <sup>nd</sup> cycle | 3 <sup>rd</sup> cycle |      |                                                      |                                              |
| CoIn/CeO <sub>2</sub>               | 1               | 4.58                                          | 2.25                  | 2.13                  | 2.19 | 2.05                                                 |                                              |
| CoIn <sub>4</sub> /CeO <sub>2</sub> | 0.25            | 2.53                                          | 2.02                  | 1.95                  | 1.99 | 1.92                                                 |                                              |
| CoIn <sub>8</sub> /CeO <sub>2</sub> | 0.125           | 2.43                                          | 2.09                  | 2.00                  | 2.04 | 1.96                                                 |                                              |
| In/CeO <sub>2</sub>                 | 0               | 2.16                                          | 1.67                  | 1.53                  | 1.60 | 1.46                                                 |                                              |

<sup>c</sup> CO yield reported in Table S9
